# Supplementary material
Source: PubMed Central journal article supplement (PMC2638897)
Supplement: ern186_2.pdf [file ern186_2.pdf]

**Supplemental Table S3:** Reproducible phenotypic effect of RNAi constructs targeting four candidate genes.

| RNAi target | Series <sup>b</sup> | DsRed-fluorescent cells (normalized to control) <sup>a</sup> |                   |                     | Ratio <sup>e</sup> | t-test Ratio <sup>f</sup> |
|-------------|---------------------|--------------------------------------------------------------|-------------------|---------------------|--------------------|---------------------------|
|             |                     | pIPKTA30 <sup>c</sup>                                        | RNAi-test constr. | t-test <sup>d</sup> |                    |                           |
| HvDRF1      | 1                   | 0,813±0,074                                                  | 0,526±0,057       | 0,003               | 0,650±0,043        | 0,001                     |
| HvDRF1      | 2                   | 0,985±0,137                                                  | 0,731±0,068       | 0,053               | 0,763±0,055        | 0,012                     |
| HvDRF1      | both                | 0,899±0,079                                                  | 0,629±0,054       | 0,0004              | 0,706±0,038        | <0,0001                   |
| HvDhn6      | 1                   | 1,041±0,125                                                  | 0,808±0,075       | 0,031               | 0,787±0,046        | 0,010                     |
| HvDhn6      | 2                   | 0,856±0,046                                                  | 0,670±0,024       | 0,002               | 0,786±0,021        | 0,001                     |
| HvDhn6      | both                | 0,949±0,070                                                  | 0,739±0,044       | 0,0003              | 0,786±0,024        | <0,0001                   |
| HvHVA1      | 1                   | 1,041±0,125                                                  | 0,658±0,053       | 0,065               | 0,669±0,096        | 0,026                     |
| HvHVA1      | 2                   | 0,856±0,046                                                  | 0,636±0,030       | 0,004               | 0,747±0,035        | 0,002                     |
| HvHVA1      | both                | 0,949±0,070                                                  | 0,647±0,029       | 0,004               | 0,708±0,050        | <0,0001                   |
| HvNHX1      | 1                   | 1,041±0,125                                                  | 0,842±0,098       | 0,041               | 0,813±0,052        | 0,023                     |
| HvNHX1      | 2                   | 0,856±0,046                                                  | 0,666±0,028       | 0,004               | 0,782±0,027        | 0,001                     |
| HvNHX1      | both                | 0,949±0,070                                                  | 0,754±0,056       | 0,0003              | 0,797±0,028        | <0,0001                   |

<sup>a</sup>Control, non-stressed leaf segments.

<sup>b</sup>Each series comprised five independent experiments. Values represent mean ± SEM.

<sup>c</sup>Empty RNAi vector.

<sup>d</sup>Paired two-sample *t*-test, two-sided.

<sup>e</sup>Ratio of the normalized number of DsRed-fluorescent cells in dehydration-stressed leaves after bombardment with RNAi-test construct *versus* the empty-vector control (column 4/column 3).

<sup>f</sup>One-sample *t*-test against hypothetical value “1”, two-sided.

**Supplemental Table S4:** Relation between relative fresh weight and relative water content of bombarded barley leaf segments.

|                               | Control <sup>a</sup>      | Dehydrated <sup>b</sup> |
|-------------------------------|---------------------------|-------------------------|
| RFW <sup>c</sup> after 4 days | 101.3 ± 0.22 <sup>e</sup> | 69.8 ± 1.3 <sup>e</sup> |
| RWC <sup>d</sup> after 4 days | 97.0 ± 0.1 <sup>e</sup>   | 60.1 ± 0.5 <sup>e</sup> |

<sup>a</sup>Leaf segments incubated on 0.5% water Phytoagar during four days in closed petri dishes.

<sup>b</sup>Leaf segments dehydrated to 60% RFW and incubated on moist paper during four days in closed petri dishes.

<sup>c</sup>Relative fresh weight (%) =  $(FW_{4d}/FW_{initial}) \times 100$ .

<sup>d</sup>Relative water content (%) =  $(FW_{4d}-DW)/(TW-DW) \times 100$ ; DW, dry weight after drying leaf segments for 24 h at 65°C; TW, turgid weight after incubation of leaf segments on water during 24 h at 20°C.

<sup>e</sup>Mean ± SEM of five bombardments with pGFP, pUbiDsRed-nos and pIPKTA30N empty RNAi vector.
